# Supplementary material for: Deletion of miPEP in adipocytes protects against obesity and insulin resistance by boosting muscle metabolism
Source: PubMed Central journal article supplement (PMC11292358; doi:10.1016/j.molmet.2024.101983), 2024-07-01

**Supplementary Figure 1. Additional characterisation of miPEP deficient mice in normal chow diet**

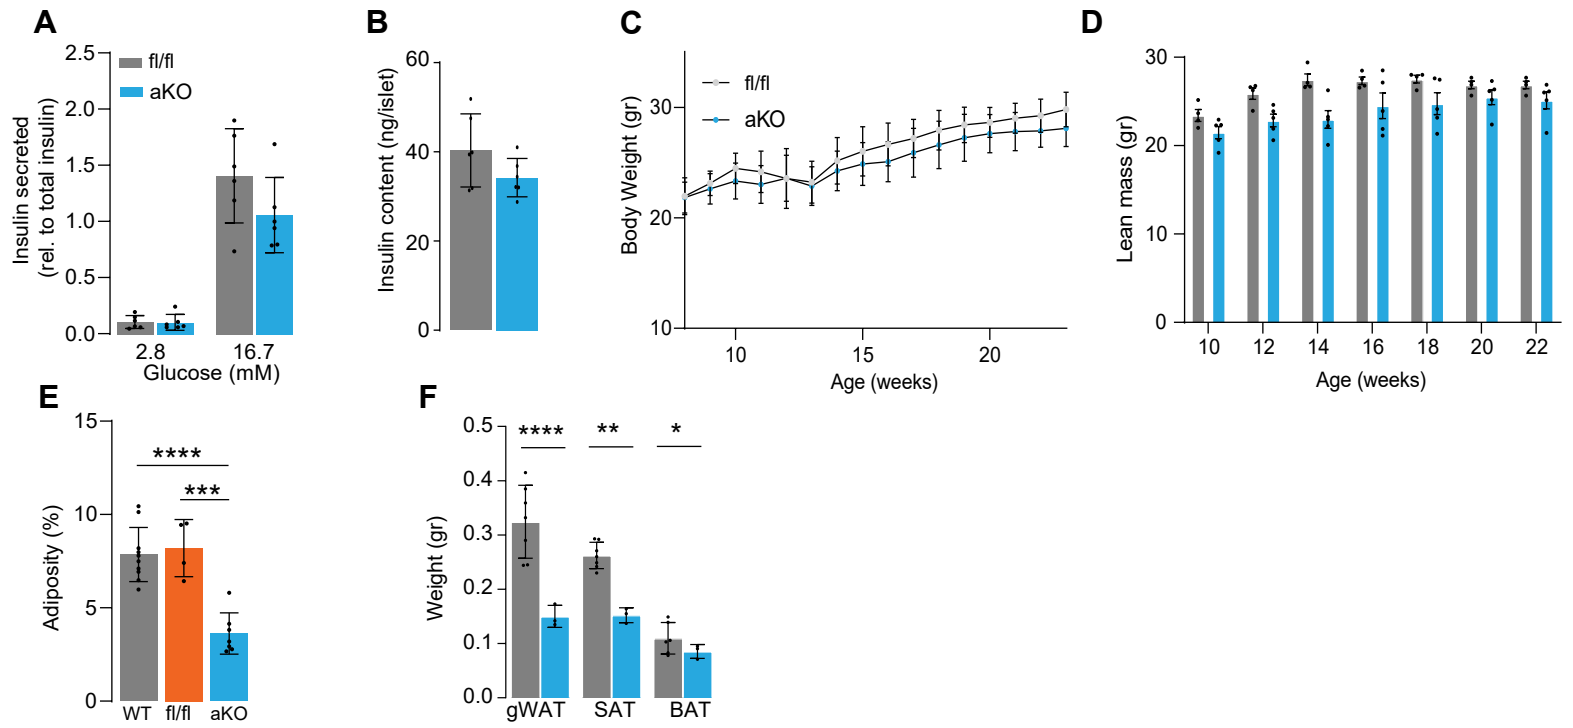

Supplement: mmc1.pdf [file mmc1.pdf]
