# Supplementary material for: Deletion of miPEP in adipocytes protects against obesity and insulin resistance by boosting muscle metabolism
Source: PubMed Central journal article supplement (PMC11292358; doi:10.1016/j.molmet.2024.101983), 2024-07-01

**Supplementary Figure 2. miPEP deficient female mice are protected against diet induced obesity and glucose intolerance.**

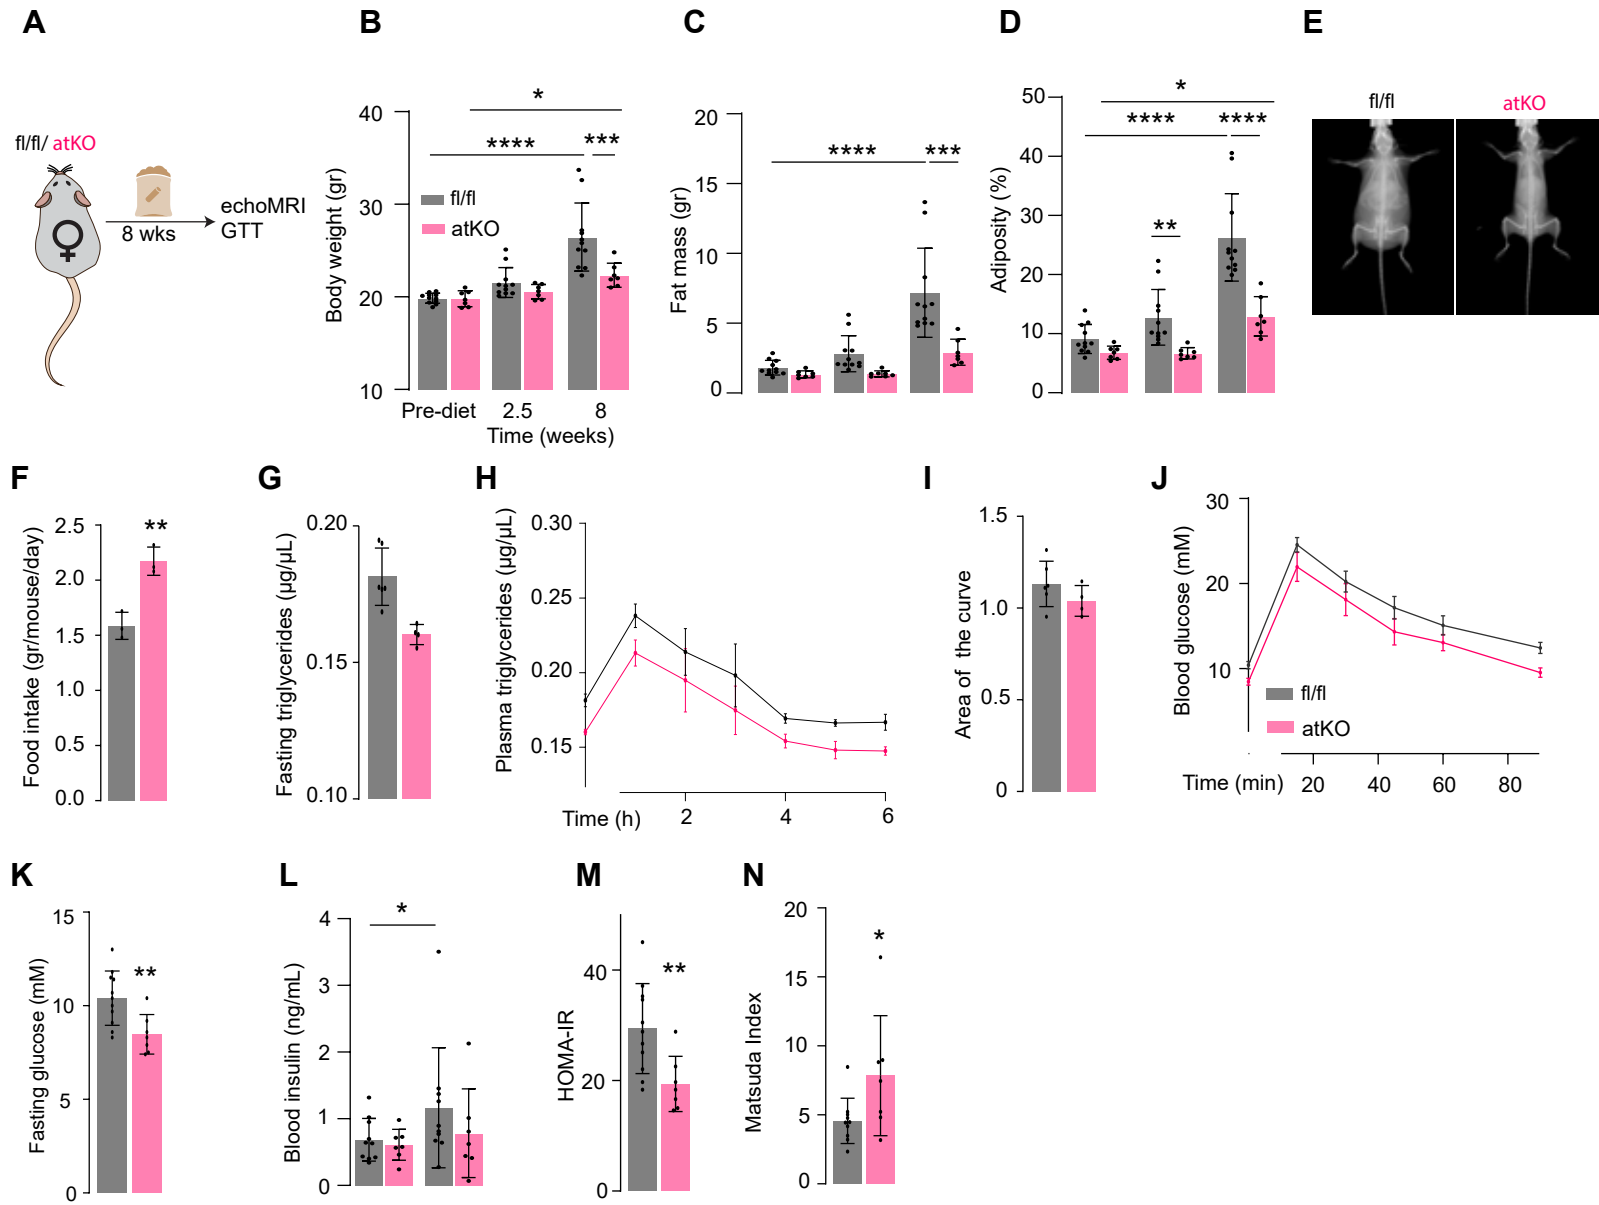

Supplement: mmc2.pdf [file mmc2.pdf]
