# Supplementary material for: Deletion of miPEP in adipocytes protects against obesity and insulin resistance by boosting muscle metabolism
Source: PubMed Central journal article supplement (PMC11292358; doi:10.1016/j.molmet.2024.101983), 2024-07-01

**Supplementary Figure 3. miPEP deletion does not affect RER, food intake or locomotor activity when fed normal chow diet.**

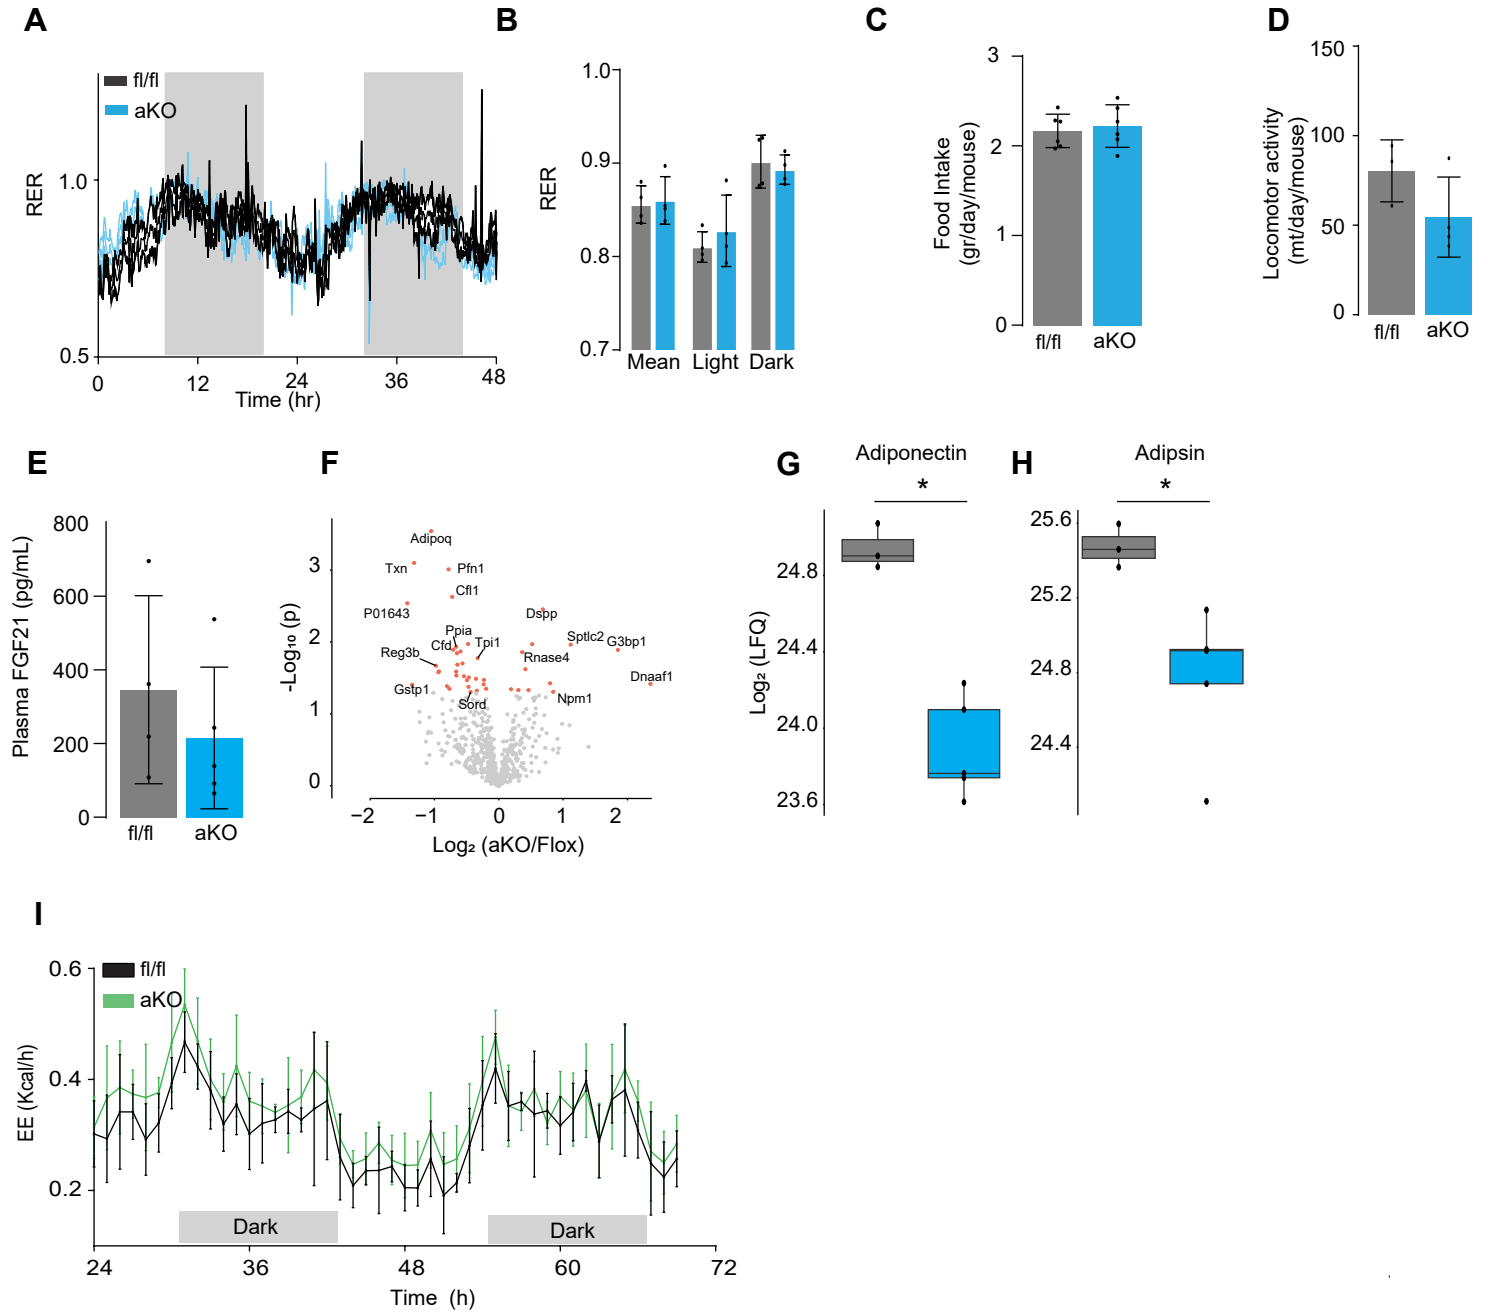

Supplement: mmc3.pdf [file mmc3.pdf]
