# Supplementary material for: Deletion of miPEP in adipocytes protects against obesity and insulin resistance by boosting muscle metabolism
Source: PubMed Central journal article supplement (PMC11292358; doi:10.1016/j.molmet.2024.101983), 2024-07-01

# Supplementary Figure 4. Gene set enrichment analysis of brown adipose tissue.

**A**

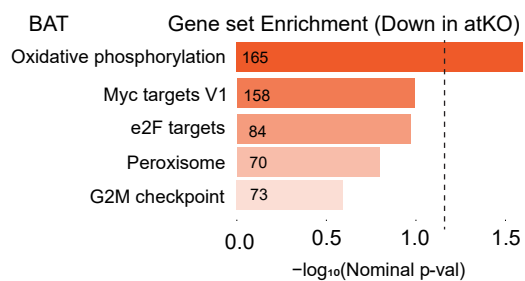

**B**

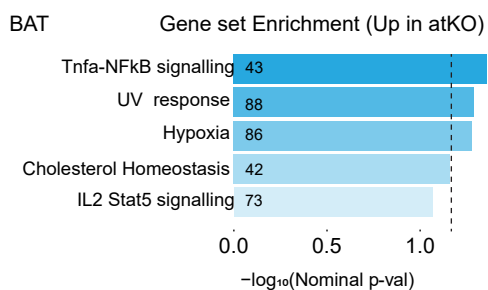

Supplement: mmc4.pdf [file mmc4.pdf]
